# Supplementary material for: Microbial allies: shaping growth, physiology, and rhizosphere dynamics of onion (Allium cepa L.)
Source: PeerJ. 2026 Jan 6;14:e20566. doi: 10.7717/peerj.20566 (PMC12786136; doi:10.7717/peerj.20566)
Supplement: Supplemental Information 1 [file peerj-14-20566-s001.xlsx]

## Sheet: Sheet1
		Plant Height (cm)						Total chlorophyll content (mg/g DW)
Treatments	Treatments	R1	R2	R3	Plant height		Treatments	Treatments	R1	R2	R3	Total chlorophyll content (mg/g DW				Stomatal conductance (mol H2O2 m-2 s-1)
P. india	T1	42	43	46	43.6667		P. india	T1	3.89	4.05	4.76	4.23333			Treatments	Treatments	R1	R2	R3	Photosynthesis (µmol m-2 s-1)
Azospirillum	T2	45	48	50	47.6667		Azospirillum	T2	3.69	4.41	4.73	4.27667			P. india	T1	3.07556	3.14152	3.10079	3.10595
Azotobacter	T3	46.5	51	48	48.5		Azotobacter	T3	4.56	3.57	4.15	4.09333			Azospirillum	T2	3.5684	3.49048	3.57929	3.54606
PSB	T5	43.2	52	45	46.7333		PSB	T5	3.16	3.71	3.65	3.50667			Azotobacter	T3	3.27267	3.19467	3.23495	3.23409
Control	T6	39.6	38.12	35.64	37.7867		Control	T6	3.25	3.54	3.06	3.28333			PSB	T5	2.79404	2.64445	3.11017	2.84955
Absolute control	T7	33.6	35	32.87	33.8233		Absolute control	T7	2.65	2.31	2.18	2.38			Control	T6	2.2362	2.04925	1.932	2.07248
															Absolute control	T7	2.16613	1.95092	1.99362	2.03689
		No. of Leaves						Total antioxidant (mg/g DW)
Treatments	Treatments	R1	R2	R3	Leaves plant-1		Treatments	Treatments	R1	R2	R3	Total antioxidant (mg/g DW)
P. india	T1	8	7	6	7		P. india	T1	4.23	5.01	3.65	4.29667				CTD
Azospirillum	T2	9	9	8	8.66667		Azospirillum	T2	5.03	4.27	4.061	4.45367			Treatments	Treatments	R1	R2	R3	CTD
Azotobacter	T3	8	8	9	8.33333		Azotobacter	T3	4.56	3.97	4.18	4.23667			P. india	T1	-0.45	-0.48	-0.43	-0.453333
PSB	T5	8	7	8	7.66667		PSB	T5	3.69	4.13	4.23	4.01667			Azospirillum	T2	-0.6	-0.57	-0.65	-0.606667
Control	T6	7	7	6	6.66667		Control	T6	2.36	2.14	1.98	2.16			Azotobacter	T3	-0.79	-0.82	-0.74	-0.783333
Absolute control	T7	6	5	5	5.33333		Absolute control	T7	1.45	1.64	1.38	1.49			PSB	T5	-0.36	-0.27	-0.34	-0.323333
															Control	T6	0.36	0.25	0.29	0.3
		Leaf Area sq.cm						Photosynthesis (µmol CO2 m-2 s-1)							Absolute control	T7	0.46	0.38	0.41	0.416667
Treatments	Treatments	R1	R2	R3	Leaves plant-1		Treatments	Treatments	R1	R2	R3	Photosynthesis (µmol m-2 s-1)
P. india	T1	249.314	256.194	239.854	248.454		P. india	T1	6.93	7.13	7.05	7.03667
Azospirillum	T2	245.659	234.092	237.962	239.238		Azospirillum	T2	6.54	7.24	8.13	7.30333				Phenol content (mg GAE/gm DW)
Azotobacter	T3	260.924	256.237	246.218	254.46		Azotobacter	T3	6.583	7.56	7.29	7.14433			Treatments	Treatments	R1	R2	R3	Phenol content (mg GAE/g DW)
PSB	T5	264.622	250.432	254.431	256.495		PSB	T5	7.89	8.61	7.48	7.99333			P. india	T1	46	42.3	47.8	45.3667
Control	T6	241.746	228.201	233.017	234.321		Control	T6	6.53	5.84	6.12	6.16333			Azospirillum	T2	51.3	48.9	51.7	50.6333
Absolute control	T7	219.171	211.99	224.03	218.397		Absolute control	T7	3.23	3.63	4.13	3.66333			Azotobacter	T3	52.3	55.4	48.7	52.1333
															PSB	T5	53.6	51.3	49.7	51.5333
															Control	T6	39.7	40.1	36.8	38.8667
															Absolute control	T7	29.8	32.6	40.6	34.3333
	Flavanoid content (mg Quercitin eqivalent/g DW)
Treatments	Treatments	R1	R2	R3	Flavanoid content mg QE/g DW
P. india	T1	0.82	0.86	0.79	0.823333
Azospirillum	T2	0.76	0.79	0.85	0.8
Azotobacter	T3	0.89	0.76	0.81	0.82
PSB	T5	0.79	0.83	0.75	0.79
Control	T6	0.63	0.71	0.62	0.653333
Absolute control	T7	0.56	0.49	0.51	0.52
