# Supplementary material for: Microbial allies: shaping growth, physiology, and rhizosphere dynamics of onion (Allium cepa L.)
Source: PeerJ. 2026 Jan 6;14:e20566. doi: 10.7717/peerj.20566 (PMC12786136; doi:10.7717/peerj.20566)
Supplement: Supplemental Information 2 [file peerj-14-20566-s002.xlsx]

## Sheet: kingdom
index	k__Bacteria	k__Archaea
Abs_Con_1	57312	3354
Abs_Con_2	73185	4757
Azospirilum_1	71845	7804
Azospirilum_2	85330	8500
Azotobacter_1	126895	2584
Azotobacter_2	90575	1863
Blank_1	75573	3249
Blank_2	110912	3713
Control_1	69893	5704
Control_2	99106	6855
P.indica_1	43186	3664
P.indica_2	76972	5541
PSB_1	44339	2341
PSB_2	78466	4243

## Sheet: phylum
index	k__Bacteria;p__Acidobacteria	k__Bacteria;p__Actinobacteria	k__Bacteria;p__Gemmatimonadetes	k__Bacteria;p__Bacteroidetes	k__Bacteria;p__Proteobacteria	k__Bacteria;p__Armatimonadetes	k__Bacteria;p__Chloroflexi	k__Bacteria;p__Planctomycetes	k__Bacteria;p__Firmicutes	k__Archaea;p__Crenarchaeota	k__Bacteria;p__TM7	k__Bacteria;p__Nitrospirae	k__Bacteria;p__Verrucomicrobia	k__Archaea;p__Euryarchaeota	k__Bacteria;p__WS3	k__Bacteria;p__Chlamydiae	k__Bacteria;p__BRC1
Abs_Con_1	760	16695	896	1979	11512	372	3318	3689	18052	3354	0	0	0	0	0	39	0
Abs_Con_2	4156	21880	822	3077	18224	518	8161	6810	7583	4757	0	1453	501	0	0	0	0
Azospirilum_1	5835	22516	2258	624	13586	1238	8719	7208	8109	7656	0	1752	0	148	0	0	0
Azospirilum_2	6138	23918	2040	689	17388	1377	11765	8800	9744	8311	0	2963	335	189	173	0	0
Azotobacter_1	12976	32080	3613	1498	20758	592	12177	7428	31962	2584	0	3308	503	0	0	0	0
Azotobacter_2	8659	21767	3108	973	12321	78	6799	5027	29620	1863	0	2223	0	0	0	0	0
Blank_1	1250	18859	2401	2628	31491	522	8620	5021	3240	3249	0	1279	262	0	0	0	0
Blank_2	8583	30473	3889	5984	28506	0	16517	7901	5560	3713	0	2033	1395	0	0	0	71
Control_1	4325	19793	812	1615	15662	822	10014	7182	7196	5704	0	1699	773	0	0	0	0
Control_2	7395	26698	2610	2350	20076	1468	13999	10725	10191	6855	0	2126	1468	0	0	0	0
P.indica_1	2158	12480	734	3250	11334	0	5776	2317	4042	3664	0	675	420	0	0	0	0
P.indica_2	4921	23055	1995	5637	18985	1043	10748	6482	1717	5541	0	1579	810	0	0	0	0
PSB_1	2853	10277	1541	648	11879	654	5605	4419	4875	2341	127	983	478	0	0	0	0
PSB_2	3443	15797	1617	2280	27770	966	6574	7676	8592	3985	0	1603	1994	258	154	0	0

## Sheet: class
index	k__Bacteria;p__Acidobacteria;c__Acidobacteria-6	k__Bacteria;p__Acidobacteria;c__[Chloracidobacteria]	k__Bacteria;p__Actinobacteria;c__Actinobacteria	k__Bacteria;p__Gemmatimonadetes;c__Gemm-5	k__Bacteria;p__Bacteroidetes;c__[Saprospirae]	k__Bacteria;p__Proteobacteria;c__Alphaproteobacteria	k__Bacteria;p__Armatimonadetes;c__0319-6E2	k__Bacteria;p__Chloroflexi;c__TK10	k__Bacteria;p__Chloroflexi;c__Thermomicrobia	k__Bacteria;p__Gemmatimonadetes;__	k__Bacteria;p__Actinobacteria;c__Rubrobacteria	k__Bacteria;p__Acidobacteria;c__Solibacteres	k__Bacteria;p__Planctomycetes;c__Planctomycetia	k__Bacteria;p__Firmicutes;c__Bacilli	k__Bacteria;p__Planctomycetes;c__Phycisphaerae	k__Bacteria;p__Chloroflexi;c__Anaerolineae	k__Archaea;p__Crenarchaeota;c__Thaumarchaeota	k__Bacteria;p__Actinobacteria;__	k__Bacteria;p__Proteobacteria;c__Betaproteobacteria	k__Bacteria;p__Actinobacteria;c__Thermoleophilia	k__Bacteria;p__Chloroflexi;c__Chloroflexi	k__Bacteria;p__Gemmatimonadetes;c__Gemmatimonadetes	k__Bacteria;p__Actinobacteria;c__Acidimicrobiia	k__Bacteria;p__TM7;c__TM7-1	k__Bacteria;p__Actinobacteria;c__MB-A2-108	k__Bacteria;p__Gemmatimonadetes;c__Gemm-3	k__Bacteria;p__Bacteroidetes;c__Cytophagia	k__Bacteria;p__Gemmatimonadetes;c__Gemm-1	k__Bacteria;p__Proteobacteria;c__Gammaproteobacteria	k__Bacteria;p__Nitrospirae;c__Nitrospira	k__Bacteria;p__Bacteroidetes;c__Flavobacteriia	k__Bacteria;p__Proteobacteria;__	k__Bacteria;p__Verrucomicrobia;c__Verrucomicrobiae	k__Bacteria;p__Chloroflexi;c__	k__Archaea;p__Euryarchaeota;c__Thermoplasmata	k__Bacteria;p__Acidobacteria;c__Acidobacteriia	k__Bacteria;p__Bacteroidetes;__	k__Bacteria;p__Planctomycetes;c__Pla3	k__Bacteria;p__Proteobacteria;c__Deltaproteobacteria	k__Bacteria;p__Chloroflexi;c__Ktedonobacteria	k__Bacteria;p__WS3;c__PRR-12	k__Bacteria;p__Chloroflexi;c__Ellin6529	k__Bacteria;p__Chloroflexi;__	k__Bacteria;p__Verrucomicrobia;c__[Pedosphaerae]	k__Bacteria;p__Verrucomicrobia;c__Opitutae	k__Bacteria;p__Chloroflexi;c__P2-11E	k__Bacteria;p__Acidobacteria;c__iii1-8	k__Bacteria;p__Chloroflexi;c__Gitt-GS-136	k__Bacteria;p__Chloroflexi;c__SAR202
Abs_Con_1	0	760	5846	0	774	9846	372	1796	1456	0	3443	0	2887	18052	802	0	3354	0	84	4698	66	0	2708	0	0	88	356	808	1582	0	849	0	0	0	0	0	0	0	0	0	0	0	0	0	0	0	0	0	0
Abs_Con_2	3133	988	7467	0	1063	11528	518	2140	1938	0	4256	0	5664	7583	1146	970	4757	0	2832	5523	2480	0	3234	0	1400	0	543	822	3371	1453	1165	0	501	0	0	0	229	0	493	0	0	535	98	0	0	0	0	0	0
Azospirilum_1	3467	1599	7809	0	398	8923	1238	3005	1829	0	4677	769	5804	8109	1367	705	7656	0	1283	5554	2703	797	2982	0	1494	193	0	1268	1160	1752	49	0	0	0	148	0	177	37	2220	0	0	0	167	0	0	0	0	207	103
Azospirilum_2	3742	1462	6391	356	444	10823	1377	3555	893	0	3222	934	7212	9744	1588	1260	8311	1213	442	7044	2875	818	3818	0	2230	150	0	716	3332	2963	0	0	0	417	189	0	245	0	2791	0	173	0	2257	335	0	81	0	325	102
Azotobacter_1	7257	4077	10207	667	1085	13280	592	4879	2490	0	4494	1642	6310	31962	1118	1515	2584	0	2360	11548	3293	1173	3386	0	2445	0	0	1773	2580	3308	0	0	0	0	0	0	368	0	2538	0	0	0	0	503	0	0	0	0	0
Azotobacter_2	5179	2194	7566	472	722	9497	78	3573	1719	741	3559	1286	4339	29620	688	942	1863	0	1835	9097	0	709	1545	0	0	0	0	1186	989	2223	0	0	0	0	0	0	251	0	0	0	0	565	0	0	0	0	0	0	0
Blank_1	0	0	8923	0	2628	31491	522	3531	1234	0	4435	1250	3391	3240	1630	37	3249	0	0	5501	2281	1423	0	0	0	0	0	978	0	1279	0	0	0	0	0	0	0	0	0	0	0	0	1537	251	11	0	0	0	0
Blank_2	5083	1715	13088	0	4644	19854	0	4405	2797	2294	7255	1785	5477	5560	2424	982	3713	629	5160	7289	7312	152	2212	0	0	0	1340	1443	979	2033	0	791	0	0	0	0	0	0	1722	0	0	814	155	296	218	0	0	0	0
Control_1	2747	1131	6375	0	1102	10964	822	2247	2451	0	3497	0	5233	7196	1949	936	5704	1672	2044	5763	2019	812	1527	0	959	0	0	0	1519	1699	0	0	329	299	0	0	513	0	1135	0	0	692	1370	444	0	0	0	0	0
Control_2	4345	1435	8182	369	1586	12937	1468	3964	3364	751	6859	1096	7826	10191	2843	1239	6855	0	2237	7238	3968	900	3172	0	1247	198	371	392	2510	2126	166	0	315	298	0	519	227	56	2392	51	0	697	343	650	103	0	0	0	75
P.indica_1	1725	433	4983	0	1438	7609	0	1570	1446	0	2969	0	1409	3736	908	291	3664	0	1928	3131	1208	0	899	0	498	153	697	581	1060	675	1115	0	65	0	0	0	0	0	737	0	0	425	836	0	0	0	0	0	0
P.indica_2	2978	880	9357	0	2535	12925	1043	2921	3609	0	5511	939	4576	1717	1906	574	5541	0	3555	5822	2676	842	1632	0	733	188	1109	965	1785	1579	1939	0	0	214	0	124	54	0	720	0	0	528	179	0	0	47	0	0	0
PSB_1	1556	597	5121	219	0	5832	654	1358	1384	0	1285	700	2929	4875	1032	872	2341	0	3001	2823	1381	920	579	127	469	0	648	402	1409	983	0	0	263	0	0	0	0	0	1637	0	0	610	0	0	215	0	0	0	0
PSB_2	2229	0	8866	0	1413	9808	966	70	321	0	1968	0	5819	8592	1857	183	3985	0	4628	4963	2825	1449	0	0	0	168	867	0	13334	1603	0	0	550	0	258	0	0	0	0	0	154	1067	2108	1087	357	0	1214	0	0
[truncated: 10 more columns]

## Sheet: order
index	k__Bacteria;p__Acidobacteria;c__Acidobacteria-6;o__iii1-15	k__Bacteria;p__Acidobacteria;c__[Chloracidobacteria];o__RB41	k__Bacteria;p__Actinobacteria;c__Actinobacteria;o__Actinomycetales	k__Bacteria;p__Gemmatimonadetes;c__Gemm-5;o__	k__Bacteria;p__Bacteroidetes;c__[Saprospirae];o__[Saprospirales]	k__Bacteria;p__Proteobacteria;c__Alphaproteobacteria;o__Rhodospirillales	k__Bacteria;p__Armatimonadetes;c__0319-6E2;o__	k__Bacteria;p__Chloroflexi;c__TK10;o__AKYG885	k__Bacteria;p__Chloroflexi;c__TK10;o__	k__Bacteria;p__Chloroflexi;c__Thermomicrobia;o__AKYG1722	k__Bacteria;p__Gemmatimonadetes;__;__	k__Bacteria;p__Actinobacteria;c__Rubrobacteria;o__Rubrobacterales	k__Bacteria;p__Acidobacteria;c__Solibacteres;o__Solibacterales	k__Bacteria;p__Planctomycetes;c__Planctomycetia;__	k__Bacteria;p__Firmicutes;c__Bacilli;o__Bacillales	k__Bacteria;p__Planctomycetes;c__Phycisphaerae;o__WD2101	k__Bacteria;p__Chloroflexi;c__Anaerolineae;o__Caldilineales	k__Archaea;p__Crenarchaeota;c__Thaumarchaeota;o__Nitrososphaerales	k__Bacteria;p__Planctomycetes;c__Planctomycetia;o__Planctomycetales	k__Bacteria;p__Actinobacteria;__;__	k__Bacteria;p__Proteobacteria;c__Betaproteobacteria;o__Burkholderiales	k__Bacteria;p__Actinobacteria;c__Thermoleophilia;o__Solirubrobacterales	k__Bacteria;p__Proteobacteria;c__Alphaproteobacteria;o__Rhizobiales	k__Bacteria;p__Chloroflexi;c__Chloroflexi;o__AKIW781	k__Bacteria;p__Chloroflexi;c__Chloroflexi;o__[Roseiflexales]	k__Bacteria;p__Planctomycetes;c__Planctomycetia;o__Gemmatales	k__Bacteria;p__Gemmatimonadetes;c__Gemmatimonadetes;__	k__Bacteria;p__Actinobacteria;c__Acidimicrobiia;o__Acidimicrobiales	k__Bacteria;p__Actinobacteria;c__Actinobacteria;__	k__Bacteria;p__TM7;c__TM7-1;o__	k__Bacteria;p__Chloroflexi;c__Thermomicrobia;o__JG30-KF-CM45	k__Bacteria;p__Actinobacteria;c__MB-A2-108;o__0319-7L14	k__Bacteria;p__Gemmatimonadetes;c__Gemm-3;o__	k__Bacteria;p__Bacteroidetes;c__Cytophagia;o__Cytophagales	k__Bacteria;p__Gemmatimonadetes;c__Gemm-1;o__	k__Bacteria;p__Chloroflexi;c__Anaerolineae;o__envOPS12	k__Bacteria;p__Proteobacteria;c__Gammaproteobacteria;o__Pseudomonadales	k__Bacteria;p__Actinobacteria;c__Actinobacteria;o__Micrococcales	k__Bacteria;p__Chloroflexi;c__Anaerolineae;o__GCA004	k__Bacteria;p__Actinobacteria;c__Thermoleophilia;o__Gaiellales	k__Bacteria;p__Nitrospirae;c__Nitrospira;o__Nitrospirales	k__Bacteria;p__Bacteroidetes;c__Flavobacteriia;o__Flavobacteriales	k__Bacteria;p__Proteobacteria;__;__	k__Bacteria;p__Verrucomicrobia;c__Verrucomicrobiae;o__Verrucomicrobiales	k__Bacteria;p__Proteobacteria;c__Gammaproteobacteria;o__Xanthomonadales	k__Bacteria;p__Chloroflexi;c__;o__	k__Bacteria;p__Chloroflexi;c__Chloroflexi;__	k__Archaea;p__Euryarchaeota;c__Thermoplasmata;o__E2	k__Bacteria;p__Proteobacteria;c__Alphaproteobacteria;o__Sphingomonadales
Abs_Con_1	0	0	5245	0	774	2198	372	904	892	0	0	3443	0	0	18052	802	0	3354	0	0	0	0	4673	66	0	2887	0	2708	294	0	1456	0	88	356	808	0	1582	307	0	4698	0	849	0	0	0	0	0	0	1690
Abs_Con_2	2685	0	6503	0	1063	3050	518	153	1987	0	0	4256	0	0	7583	1146	0	4757	257	0	2832	0	182	562	1918	4374	0	3234	0	0	1938	1400	0	543	822	402	1941	964	333	5523	1453	1165	0	501	1430	0	0	0	6319
Azospirilum_1	3467	1304	6163	0	398	2606	1238	310	0	0	0	4677	769	1614	8109	1367	0	7656	0	0	1283	0	3709	166	2537	4190	661	2982	741	0	1829	1494	193	0	1268	640	1160	905	0	5554	1752	49	0	0	0	0	0	148	2527
Azospirilum_2	3742	0	4847	356	444	2875	1377	2459	1096	893	0	3222	934	0	9744	1588	0	8311	0	1213	442	2094	7948	490	2385	5540	818	3818	632	0	0	2230	150	0	716	742	0	912	369	4950	2963	0	0	0	3332	417	0	189	0
Azotobacter_1	7257	1755	10063	667	1085	2058	592	2553	1283	0	0	4494	1642	0	31962	1118	0	2584	0	0	0	3726	7995	0	846	6310	1173	3386	0	0	2490	2445	0	0	1773	981	999	144	0	7822	3308	0	0	0	1581	0	2447	0	3014
Azotobacter_2	5179	0	7478	472	722	72	78	2664	909	0	741	3559	1286	0	29620	688	0	1863	0	0	1835	0	6999	0	0	4339	267	1545	0	0	1719	0	0	0	1186	942	0	88	0	9097	2223	0	0	0	989	0	0	0	1980
Blank_1	0	0	7881	0	2628	384	522	0	0	0	0	4435	1250	627	3240	1630	0	3249	0	0	0	0	7071	0	2281	2764	1423	0	373	0	1234	0	0	0	978	0	0	669	0	5501	1279	0	0	0	0	0	0	0	24036
Blank_2	5083	1715	11577	0	4644	1907	0	2583	1822	0	2294	7255	1785	1672	5560	2424	0	3713	0	629	4433	2069	13348	2023	2863	3805	0	2212	521	0	2797	0	0	1340	1443	502	0	990	275	5220	2033	0	791	0	0	0	2403	0	3550
Control_1	2747	1131	5445	0	1102	3427	822	90	2157	0	0	3497	0	0	7196	1949	0	5704	228	1672	847	1837	5567	416	64	3991	626	1527	0	0	2451	959	0	0	0	630	751	930	306	3926	1699	0	0	329	768	299	0	0	1970
Control_2	4345	309	6837	369	1586	2838	1468	690	0	0	751	6859	1096	565	10191	2694	0	6855	258	0	2237	2226	9820	661	3307	6566	900	3172	0	0	3364	1247	198	371	392	809	1034	1345	430	5012	2126	166	0	315	673	298	0	0	0
P.indica_1	0	433	4632	0	1438	1578	0	149	0	0	0	2969	0	0	3736	908	0	3664	0	0	1928	1232	3601	594	55	338	0	899	0	0	1446	498	153	697	581	251	0	351	0	1899	675	1115	0	65	1060	0	559	0	2281
P.indica_2	2978	880	8543	0	2535	781	1043	2921	0	1260	0	5511	939	0	1717	1906	107	5541	0	0	3555	2025	8092	1298	34	3491	842	1632	252	0	2349	733	188	1109	965	467	496	562	0	3797	1579	1939	0	0	1289	214	1344	0	3218
PSB_1	1556	597	4909	219	0	523	654	49	0	495	0	1285	700	0	4875	1032	0	2341	0	0	3001	0	3480	324	1057	1996	138	579	0	127	0	469	0	648	402	329	1409	212	0	2823	983	0	0	263	0	0	0	0	1829
PSB_2	2229	0	8333	0	1413	545	966	70	0	0	0	1968	0	563	8592	1726	0	3985	0	0	4628	0	6241	381	892	4002	223	0	211	0	0	0	168	867	0	0	13334	322	0	4963	1603	0	0	550	0	0	1307	258	3022
[truncated: 56 more columns]

## Sheet: family
index	k__Bacteria;p__Acidobacteria;c__Acidobacteria-6;o__iii1-15;f__	k__Bacteria;p__Acidobacteria;c__[Chloracidobacteria];o__RB41;f__Ellin6075	k__Bacteria;p__Actinobacteria;c__Actinobacteria;o__Actinomycetales;f__Thermomonosporaceae	k__Bacteria;p__Gemmatimonadetes;c__Gemm-5;o__;f__	k__Bacteria;p__Bacteroidetes;c__[Saprospirae];o__[Saprospirales];f__Chitinophagaceae	k__Bacteria;p__Proteobacteria;c__Alphaproteobacteria;o__Rhodospirillales;f__Acetobacteraceae	k__Bacteria;p__Armatimonadetes;c__0319-6E2;o__;f__	k__Bacteria;p__Chloroflexi;c__TK10;o__AKYG885;f__	k__Bacteria;p__Chloroflexi;c__TK10;o__AKYG885;f__Dolo_23	k__Bacteria;p__Chloroflexi;c__TK10;o__;f__	k__Bacteria;p__Chloroflexi;c__Thermomicrobia;o__AKYG1722;f__	k__Bacteria;p__Gemmatimonadetes;__;__;__	k__Bacteria;p__Actinobacteria;c__Rubrobacteria;o__Rubrobacterales;f__Rubrobacteraceae	k__Bacteria;p__Acidobacteria;c__Solibacteres;o__Solibacterales;__	k__Bacteria;p__Planctomycetes;c__Planctomycetia;__;__	k__Bacteria;p__Firmicutes;c__Bacilli;o__Bacillales;f__Bacillaceae	k__Bacteria;p__Planctomycetes;c__Phycisphaerae;o__WD2101;f__	k__Bacteria;p__Chloroflexi;c__Anaerolineae;o__Caldilineales;f__Caldilineaceae	k__Bacteria;p__Acidobacteria;c__Acidobacteria-6;o__iii1-15;f__mb2424	k__Archaea;p__Crenarchaeota;c__Thaumarchaeota;o__Nitrososphaerales;f__Nitrososphaeraceae	k__Bacteria;p__Planctomycetes;c__Planctomycetia;o__Planctomycetales;f__Planctomycetaceae	k__Bacteria;p__Actinobacteria;__;__;__	k__Bacteria;p__Proteobacteria;c__Betaproteobacteria;o__Burkholderiales;__	k__Bacteria;p__Actinobacteria;c__Thermoleophilia;o__Solirubrobacterales;__	k__Bacteria;p__Proteobacteria;c__Alphaproteobacteria;o__Rhizobiales;__	k__Bacteria;p__Chloroflexi;c__Chloroflexi;o__AKIW781;f__	k__Bacteria;p__Chloroflexi;c__Chloroflexi;o__[Roseiflexales];f__	k__Bacteria;p__Proteobacteria;c__Alphaproteobacteria;o__Rhodospirillales;f__Rhodospirillaceae	k__Bacteria;p__Planctomycetes;c__Planctomycetia;o__Gemmatales;f__Gemmataceae	k__Bacteria;p__Gemmatimonadetes;c__Gemmatimonadetes;__;__	k__Bacteria;p__Actinobacteria;c__Acidimicrobiia;o__Acidimicrobiales;f__AKIW874	k__Bacteria;p__Actinobacteria;c__Actinobacteria;__;__	k__Bacteria;p__TM7;c__TM7-1;o__;f__	k__Bacteria;p__Firmicutes;c__Bacilli;o__Bacillales;f__Paenibacillaceae	k__Bacteria;p__Chloroflexi;c__Thermomicrobia;o__JG30-KF-CM45;f__	k__Bacteria;p__Actinobacteria;c__MB-A2-108;o__0319-7L14;f__	k__Bacteria;p__Gemmatimonadetes;c__Gemm-3;o__;f__	k__Bacteria;p__Bacteroidetes;c__Cytophagia;o__Cytophagales;f__Cytophagaceae	k__Bacteria;p__Proteobacteria;c__Betaproteobacteria;o__Burkholderiales;f__Comamonadaceae	k__Bacteria;p__Gemmatimonadetes;c__Gemm-1;o__;f__	k__Bacteria;p__Chloroflexi;c__Anaerolineae;o__envOPS12;f__	k__Bacteria;p__Proteobacteria;c__Alphaproteobacteria;o__Rhodospirillales;f__	k__Bacteria;p__Proteobacteria;c__Gammaproteobacteria;o__Pseudomonadales;f__Moraxellaceae	k__Bacteria;p__Actinobacteria;c__Actinobacteria;o__Actinomycetales;__	k__Bacteria;p__Actinobacteria;c__Actinobacteria;o__Micrococcales;f__	k__Bacteria;p__Chloroflexi;c__Anaerolineae;o__GCA004;f__	k__Bacteria;p__Actinobacteria;c__Acidimicrobiia;o__Acidimicrobiales;__	k__Bacteria;p__Actinobacteria;c__Thermoleophilia;o__Gaiellales;f__Gaiellaceae	k__Bacteria;p__Nitrospirae;c__Nitrospira;o__Nitrospirales;f__Nitrospiraceae
Abs_Con_1	0	0	0	0	774	0	372	904	0	892	0	0	3443	0	0	4283	802	0	0	3354	0	0	0	0	4673	66	0	523	2887	0	2708	294	0	13769	1456	0	88	356	0	808	0	1675	0	5245	307	0	0	4698	0
Abs_Con_2	1526	0	0	0	1063	0	518	97	56	1987	0	0	4256	0	0	5135	1146	0	0	4757	257	0	1329	0	182	562	0	754	3555	0	2390	0	0	1413	1938	1400	0	543	1503	822	402	2296	0	6503	964	333	0	5523	706
Azospirilum_1	3467	1304	0	0	398	189	1238	185	125	0	0	0	4677	769	1614	6150	1367	0	0	7656	0	0	1283	0	3709	166	1632	1025	3302	661	2982	741	0	1674	1829	1494	193	0	0	1268	640	1392	1160	6163	905	0	0	5554	1752
Azospirilum_2	3742	0	0	356	444	0	1377	2459	0	1096	893	0	3222	934	0	6702	1588	0	0	8311	0	1213	0	0	7772	490	0	752	3757	818	2839	632	0	1695	0	2230	150	0	442	716	742	1842	0	0	912	369	0	4950	2070
Azotobacter_1	7257	0	0	667	1085	0	592	2553	0	1283	0	0	4494	1642	0	12713	1118	0	0	2584	0	0	0	3726	7995	0	846	91	6310	1173	3386	0	0	16337	2490	2445	0	0	0	1773	981	1953	999	6924	144	0	0	7822	3308
Azotobacter_2	5179	0	0	472	722	0	78	2664	0	909	0	741	3559	1286	0	10478	688	0	0	1863	0	0	0	0	6999	0	0	72	4339	267	0	0	0	17064	1719	0	0	0	0	1186	942	0	0	5468	88	0	0	9097	2223
Blank_1	0	0	0	0	2628	0	522	0	0	0	0	0	4435	1250	627	3240	1630	0	0	3249	0	0	0	0	7071	0	2281	384	2764	1423	0	373	0	0	1234	0	0	0	0	978	0	0	0	7881	669	0	0	5501	865
Blank_2	2926	0	0	0	4342	1355	0	41	2542	1822	0	2294	7255	1785	1672	4928	2424	0	0	3713	0	629	0	2069	13348	2023	0	364	2849	0	0	521	0	0	2797	0	0	1340	964	1443	502	188	0	11577	990	275	2212	5220	1525
Control_1	2747	1099	0	0	1102	123	822	90	0	2157	0	0	3497	0	0	3506	1949	0	0	5704	228	1672	0	1837	5567	416	64	569	3991	626	0	0	0	1857	2451	959	0	0	847	0	630	2735	0	5445	930	306	0	3926	1183
Control_2	4345	309	12	369	1586	0	1468	690	0	0	0	751	6859	1096	565	6276	2694	0	0	6855	258	0	0	0	9820	661	1645	767	6566	900	1917	0	0	1804	3364	1247	198	371	2237	392	809	2071	0	6825	1345	430	0	5012	1462
P.indica_1	0	433	0	0	1438	0	0	90	59	0	0	0	2969	0	0	0	908	0	0	3664	0	0	0	1232	3601	594	55	426	338	0	0	0	0	1491	1446	498	153	697	530	581	251	1152	0	4632	351	0	0	1899	675
P.indica_2	2978	0	0	0	2535	177	1043	2921	0	0	1260	0	5511	939	0	0	1906	107	0	5541	0	0	0	2025	8092	1298	34	604	2647	842	0	252	0	1717	2349	733	188	1109	942	965	467	0	0	8543	562	0	0	3797	1255
PSB_1	1556	0	0	219	0	133	654	49	0	0	495	0	1285	700	0	3997	1032	0	0	2341	0	0	2073	0	3480	324	1057	390	1996	138	0	0	127	878	0	469	0	648	928	402	329	0	0	0	212	0	0	2823	983
PSB_2	0	0	0	0	1413	0	966	70	0	0	0	0	1968	0	563	6651	1726	0	2229	3985	0	0	3307	0	6241	381	892	545	4002	223	0	211	0	1376	0	0	168	867	1321	0	0	0	0	5720	322	0	0	4963	1603
[truncated: 96 more columns]

## Sheet: genus
index	k__Bacteria;p__Acidobacteria;c__Acidobacteria-6;o__iii1-15;f__;g__	k__Bacteria;p__Acidobacteria;c__[Chloracidobacteria];o__RB41;f__Ellin6075;g__	k__Bacteria;p__Actinobacteria;c__Actinobacteria;o__Actinomycetales;f__Thermomonosporaceae;g__Actinomadura	k__Bacteria;p__Gemmatimonadetes;c__Gemm-5;o__;f__;g__	k__Bacteria;p__Bacteroidetes;c__[Saprospirae];o__[Saprospirales];f__Chitinophagaceae;__	k__Bacteria;p__Proteobacteria;c__Alphaproteobacteria;o__Rhodospirillales;f__Acetobacteraceae;__	k__Bacteria;p__Armatimonadetes;c__0319-6E2;o__;f__;g__	k__Bacteria;p__Chloroflexi;c__TK10;o__AKYG885;f__;g__	k__Bacteria;p__Chloroflexi;c__TK10;o__AKYG885;f__Dolo_23;g__	k__Bacteria;p__Chloroflexi;c__TK10;o__;f__;g__	k__Bacteria;p__Chloroflexi;c__Thermomicrobia;o__AKYG1722;f__;g__	k__Bacteria;p__Gemmatimonadetes;__;__;__;__	k__Bacteria;p__Actinobacteria;c__Rubrobacteria;o__Rubrobacterales;f__Rubrobacteraceae;g__Rubrobacter	k__Bacteria;p__Acidobacteria;c__Solibacteres;o__Solibacterales;__;__	k__Bacteria;p__Planctomycetes;c__Planctomycetia;__;__;__	k__Bacteria;p__Firmicutes;c__Bacilli;o__Bacillales;f__Bacillaceae;g__Bacillus	k__Bacteria;p__Planctomycetes;c__Phycisphaerae;o__WD2101;f__;g__	k__Bacteria;p__Chloroflexi;c__Anaerolineae;o__Caldilineales;f__Caldilineaceae;g__	k__Bacteria;p__Acidobacteria;c__Acidobacteria-6;o__iii1-15;f__mb2424;g__	k__Archaea;p__Crenarchaeota;c__Thaumarchaeota;o__Nitrososphaerales;f__Nitrososphaeraceae;g__Candidatus Nitrososphaera	k__Bacteria;p__Planctomycetes;c__Planctomycetia;o__Planctomycetales;f__Planctomycetaceae;g__Planctomyces	k__Bacteria;p__Actinobacteria;c__Rubrobacteria;o__Rubrobacterales;f__Rubrobacteraceae;g__	k__Bacteria;p__Actinobacteria;__;__;__;__	k__Bacteria;p__Proteobacteria;c__Betaproteobacteria;o__Burkholderiales;__;__	k__Bacteria;p__Actinobacteria;c__Thermoleophilia;o__Solirubrobacterales;__;__	k__Bacteria;p__Proteobacteria;c__Alphaproteobacteria;o__Rhizobiales;__;__	k__Bacteria;p__Chloroflexi;c__Chloroflexi;o__AKIW781;f__;g__	k__Bacteria;p__Chloroflexi;c__Chloroflexi;o__[Roseiflexales];f__;g__	k__Bacteria;p__Proteobacteria;c__Alphaproteobacteria;o__Rhodospirillales;f__Rhodospirillaceae;g__	k__Bacteria;p__Planctomycetes;c__Planctomycetia;o__Gemmatales;f__Gemmataceae;__	k__Bacteria;p__Gemmatimonadetes;c__Gemmatimonadetes;__;__;__	k__Bacteria;p__Actinobacteria;c__Acidimicrobiia;o__Acidimicrobiales;f__AKIW874;g__	k__Bacteria;p__Actinobacteria;c__Actinobacteria;__;__;__	k__Bacteria;p__TM7;c__TM7-1;o__;f__;g__	k__Bacteria;p__Firmicutes;c__Bacilli;o__Bacillales;f__Paenibacillaceae;g__Ammoniphilus	k__Bacteria;p__Chloroflexi;c__Thermomicrobia;o__JG30-KF-CM45;f__;g__	k__Bacteria;p__Actinobacteria;c__MB-A2-108;o__0319-7L14;f__;g__	k__Bacteria;p__Gemmatimonadetes;c__Gemm-3;o__;f__;g__	k__Bacteria;p__Bacteroidetes;c__Cytophagia;o__Cytophagales;f__Cytophagaceae;g__Dyadobacter	k__Bacteria;p__Firmicutes;c__Bacilli;o__Bacillales;f__Bacillaceae;__	k__Bacteria;p__Bacteroidetes;c__[Saprospirae];o__[Saprospirales];f__Chitinophagaceae;g__Flavisolibacter	k__Bacteria;p__Proteobacteria;c__Betaproteobacteria;o__Burkholderiales;f__Comamonadaceae;__	k__Bacteria;p__Firmicutes;c__Bacilli;o__Bacillales;f__Paenibacillaceae;g__Brevibacillus	k__Bacteria;p__Gemmatimonadetes;c__Gemm-1;o__;f__;g__	k__Bacteria;p__Chloroflexi;c__Anaerolineae;o__envOPS12;f__;g__	k__Bacteria;p__Proteobacteria;c__Alphaproteobacteria;o__Rhodospirillales;f__;g__	k__Bacteria;p__Proteobacteria;c__Gammaproteobacteria;o__Pseudomonadales;f__Moraxellaceae;g__Acinetobacter	k__Bacteria;p__Actinobacteria;c__Actinobacteria;o__Actinomycetales;__;__	k__Bacteria;p__Actinobacteria;c__Actinobacteria;o__Micrococcales;f__;g__
Abs_Con_1	0	0	0	0	0	0	372	904	0	892	0	0	2075	0	0	0	802	0	0	3354	0	1368	0	0	0	4673	66	0	375	0	0	2708	294	0	13769	1456	0	88	356	4283	774	0	0	808	0	1675	0	5245	307
Abs_Con_2	1526	0	0	0	0	0	518	97	56	1987	0	0	2615	0	0	3417	1146	0	0	4757	257	1641	0	1329	0	182	562	0	552	0	0	2390	0	0	1413	1938	1400	0	543	1718	0	1503	0	822	402	2296	0	6503	964
Azospirilum_1	3467	1304	0	0	398	189	1238	185	125	0	0	0	2725	769	1614	0	1367	0	0	7656	0	1952	0	1283	0	3709	166	1632	0	0	661	2982	741	0	1674	1829	1494	193	0	6150	0	0	0	1268	640	1392	1160	6163	905
Azospirilum_2	3742	0	0	356	0	0	1377	2459	0	1096	893	0	3222	934	0	3326	1588	0	0	8311	0	0	1213	0	0	7772	490	0	752	3757	818	2839	632	0	1622	0	2230	150	0	3376	0	442	73	716	742	1842	0	0	912
Azotobacter_1	7257	0	0	667	0	0	592	2553	0	1283	0	0	4494	1642	0	7240	1118	0	0	2584	0	0	0	0	3726	7995	0	846	0	0	1173	3386	0	0	16337	2490	2445	0	0	5473	1085	0	0	1773	981	1953	999	6924	144
Azotobacter_2	5179	0	0	472	722	0	78	2664	0	909	0	741	3559	1286	0	4878	688	0	0	1863	0	0	0	0	0	6999	0	0	72	0	267	0	0	0	17064	1719	0	0	0	5600	0	0	0	1186	942	0	0	5468	88
Blank_1	0	0	0	0	0	0	522	0	0	0	0	0	4435	1250	627	3240	1630	0	0	3249	0	0	0	0	0	7071	0	2281	384	0	1423	0	373	0	0	1234	0	0	0	0	2628	0	0	978	0	0	0	7881	669
Blank_2	2926	0	0	0	567	1355	0	41	2542	1822	0	2294	6655	1785	1672	4928	2424	0	0	3713	0	600	629	0	2069	13348	2023	0	364	0	0	0	521	0	0	2797	0	0	0	0	3775	0	0	1443	502	188	0	11577	990
Control_1	2747	1099	0	0	0	0	822	90	0	2157	0	0	3497	0	0	0	1949	0	0	5704	228	0	1672	0	1837	5567	416	64	0	0	626	0	0	0	1857	2451	959	0	0	3506	1102	847	0	0	630	2735	0	5445	930
Control_2	4345	309	12	369	0	0	1468	690	0	0	0	751	4730	1096	565	0	2694	0	0	6855	258	2129	0	0	0	9820	661	1645	0	0	900	1917	0	0	1804	3364	1247	198	32	6276	1586	2237	0	392	809	2071	0	6825	1345
P.indica_1	0	433	0	0	0	0	0	90	59	0	0	0	2315	0	0	0	908	0	0	3664	0	654	0	0	1232	3601	594	55	426	0	0	0	0	0	1491	1446	498	153	150	0	1438	0	0	581	251	1152	0	4632	351
P.indica_2	2978	0	0	0	0	177	1043	2921	0	0	1260	0	4327	939	0	0	1906	107	0	5541	0	1184	0	0	2025	8092	1298	34	0	2309	842	0	252	0	1502	2349	733	188	164	0	2535	942	215	965	467	0	0	8543	562
PSB_1	1556	0	0	219	0	133	654	49	0	0	495	0	1285	700	0	0	1032	0	0	2341	0	0	0	2073	0	3480	324	1057	227	0	138	0	0	127	737	0	469	0	25	3997	0	928	141	402	329	0	0	0	212
PSB_2	0	0	0	0	1413	0	966	70	0	0	0	0	1968	0	563	0	1726	0	2229	3985	0	0	0	3307	0	6241	381	892	545	0	223	0	211	0	1170	0	0	168	0	6651	0	1321	206	0	0	0	0	5720	322
[truncated: 130 more columns]

## Sheet: species
index	k__Bacteria;p__Acidobacteria;c__Acidobacteria-6;o__iii1-15;f__;g__;s__	k__Bacteria;p__Acidobacteria;c__[Chloracidobacteria];o__RB41;f__Ellin6075;g__;s__	k__Bacteria;p__Actinobacteria;c__Actinobacteria;o__Actinomycetales;f__Thermomonosporaceae;g__Actinomadura;__	k__Bacteria;p__Gemmatimonadetes;c__Gemm-5;o__;f__;g__;s__	k__Bacteria;p__Bacteroidetes;c__[Saprospirae];o__[Saprospirales];f__Chitinophagaceae;__;__	k__Bacteria;p__Proteobacteria;c__Alphaproteobacteria;o__Rhodospirillales;f__Acetobacteraceae;__;__	k__Bacteria;p__Armatimonadetes;c__0319-6E2;o__;f__;g__;s__	k__Bacteria;p__Chloroflexi;c__TK10;o__AKYG885;f__;g__;s__	k__Bacteria;p__Chloroflexi;c__TK10;o__AKYG885;f__Dolo_23;g__;s__	k__Bacteria;p__Chloroflexi;c__TK10;o__;f__;g__;s__	k__Bacteria;p__Chloroflexi;c__Thermomicrobia;o__AKYG1722;f__;g__;s__	k__Bacteria;p__Gemmatimonadetes;__;__;__;__;__	k__Bacteria;p__Actinobacteria;c__Rubrobacteria;o__Rubrobacterales;f__Rubrobacteraceae;g__Rubrobacter;s__	k__Bacteria;p__Acidobacteria;c__Solibacteres;o__Solibacterales;__;__;__	k__Bacteria;p__Planctomycetes;c__Planctomycetia;__;__;__;__	k__Bacteria;p__Firmicutes;c__Bacilli;o__Bacillales;f__Bacillaceae;g__Bacillus;__	k__Bacteria;p__Planctomycetes;c__Phycisphaerae;o__WD2101;f__;g__;s__	k__Bacteria;p__Chloroflexi;c__Anaerolineae;o__Caldilineales;f__Caldilineaceae;g__;s__	k__Bacteria;p__Acidobacteria;c__Acidobacteria-6;o__iii1-15;f__mb2424;g__;s__	k__Archaea;p__Crenarchaeota;c__Thaumarchaeota;o__Nitrososphaerales;f__Nitrososphaeraceae;g__Candidatus Nitrososphaera;s__gargensis	k__Bacteria;p__Planctomycetes;c__Planctomycetia;o__Planctomycetales;f__Planctomycetaceae;g__Planctomyces;s__	k__Bacteria;p__Actinobacteria;c__Rubrobacteria;o__Rubrobacterales;f__Rubrobacteraceae;g__;s__	k__Bacteria;p__Actinobacteria;__;__;__;__;__	k__Bacteria;p__Proteobacteria;c__Betaproteobacteria;o__Burkholderiales;__;__;__	k__Bacteria;p__Actinobacteria;c__Thermoleophilia;o__Solirubrobacterales;__;__;__	k__Bacteria;p__Proteobacteria;c__Alphaproteobacteria;o__Rhizobiales;__;__;__	k__Bacteria;p__Chloroflexi;c__Chloroflexi;o__AKIW781;f__;g__;s__	k__Bacteria;p__Chloroflexi;c__Chloroflexi;o__[Roseiflexales];f__;g__;s__	k__Bacteria;p__Proteobacteria;c__Alphaproteobacteria;o__Rhodospirillales;f__Rhodospirillaceae;g__;s__	k__Bacteria;p__Planctomycetes;c__Planctomycetia;o__Gemmatales;f__Gemmataceae;__;__	k__Bacteria;p__Gemmatimonadetes;c__Gemmatimonadetes;__;__;__;__	k__Bacteria;p__Actinobacteria;c__Acidimicrobiia;o__Acidimicrobiales;f__AKIW874;g__;s__	k__Bacteria;p__Actinobacteria;c__Actinobacteria;__;__;__;__	k__Bacteria;p__TM7;c__TM7-1;o__;f__;g__;s__	k__Bacteria;p__Firmicutes;c__Bacilli;o__Bacillales;f__Paenibacillaceae;g__Ammoniphilus;__	k__Bacteria;p__Chloroflexi;c__Thermomicrobia;o__JG30-KF-CM45;f__;g__;s__	k__Bacteria;p__Actinobacteria;c__MB-A2-108;o__0319-7L14;f__;g__;s__	k__Bacteria;p__Gemmatimonadetes;c__Gemm-3;o__;f__;g__;s__	k__Bacteria;p__Bacteroidetes;c__Cytophagia;o__Cytophagales;f__Cytophagaceae;g__Dyadobacter;s__	k__Bacteria;p__Firmicutes;c__Bacilli;o__Bacillales;f__Bacillaceae;__;__	k__Bacteria;p__Bacteroidetes;c__[Saprospirae];o__[Saprospirales];f__Chitinophagaceae;g__Flavisolibacter;s__	k__Bacteria;p__Proteobacteria;c__Betaproteobacteria;o__Burkholderiales;f__Comamonadaceae;__;__	k__Bacteria;p__Firmicutes;c__Bacilli;o__Bacillales;f__Paenibacillaceae;g__Brevibacillus;__	k__Bacteria;p__Gemmatimonadetes;c__Gemm-1;o__;f__;g__;s__	k__Bacteria;p__Chloroflexi;c__Anaerolineae;o__envOPS12;f__;g__;s__	k__Bacteria;p__Proteobacteria;c__Alphaproteobacteria;o__Rhodospirillales;f__;g__;s__	k__Bacteria;p__Proteobacteria;c__Gammaproteobacteria;o__Pseudomonadales;f__Moraxellaceae;g__Acinetobacter;__	k__Bacteria;p__Actinobacteria;c__Actinobacteria;o__Actinomycetales;__;__;__	k__Bacteria;p__Actinobacteria;c__Actinobacteria;o__Micrococcales;f__;g__;s__
Abs_Con_1	0	0	0	0	0	0	372	904	0	892	0	0	2075	0	0	0	802	0	0	2520	0	1368	0	0	0	4673	66	0	375	0	0	2708	294	0	13769	1456	0	88	356	4283	774	0	0	808	0	1675	0	5245	307
Abs_Con_2	1526	0	0	0	0	0	518	97	56	1987	0	0	2615	0	0	3417	1146	0	0	3481	257	1641	0	1329	0	182	562	0	552	0	0	2390	0	0	1413	1938	1400	0	543	1718	0	1503	0	822	402	2296	0	6503	964
Azospirilum_1	3467	1304	0	0	398	189	1238	185	125	0	0	0	2725	769	1614	0	1367	0	0	4319	0	1952	0	1283	0	3709	166	1632	0	0	661	2982	741	0	1674	1829	1494	193	0	6150	0	0	0	1268	640	1392	1160	6163	905
Azospirilum_2	3742	0	0	356	0	0	1377	2459	0	1096	893	0	3222	934	0	3326	1588	0	0	4828	0	0	1213	0	0	7772	490	0	752	3757	818	2839	632	0	1622	0	2230	150	0	3376	0	442	73	716	742	1842	0	0	912
Azotobacter_1	7257	0	0	667	0	0	592	2553	0	1283	0	0	4494	1642	0	1721	1118	0	0	2346	0	0	0	0	3726	7995	0	846	0	0	1173	3386	0	0	16337	2490	2445	0	0	5473	1085	0	0	1773	981	1953	999	6924	144
Azotobacter_2	5179	0	0	472	722	0	78	2664	0	909	0	741	3559	1286	0	4878	688	0	0	1641	0	0	0	0	0	6999	0	0	72	0	267	0	0	0	17064	1719	0	0	0	5600	0	0	0	1186	942	0	0	5468	88
Blank_1	0	0	0	0	0	0	522	0	0	0	0	0	4435	1250	627	3240	1630	0	0	2311	0	0	0	0	0	7071	0	2281	384	0	1423	0	373	0	0	1234	0	0	0	0	2628	0	0	978	0	0	0	7881	669
Blank_2	2926	0	0	0	567	1355	0	41	2542	1822	0	2294	6655	1785	1672	4928	2424	0	0	2362	0	600	629	0	2069	13348	2023	0	364	0	0	0	521	0	0	2797	0	0	0	0	3775	0	0	1443	502	188	0	11577	990
Control_1	2747	1099	0	0	0	0	822	90	0	2157	0	0	3497	0	0	0	1949	0	0	3854	228	0	1672	0	1837	5567	416	64	0	0	626	0	0	0	1857	2451	959	0	0	3506	1102	847	0	0	630	2735	0	5445	930
Control_2	4345	309	12	369	0	0	1468	690	0	0	0	751	4730	1096	565	0	2694	0	0	4126	258	2129	0	0	0	9820	661	1645	0	0	900	1917	0	0	1804	3364	1247	198	32	6276	1586	2237	0	392	809	2071	0	6825	1345
P.indica_1	0	433	0	0	0	0	0	90	59	0	0	0	2315	0	0	0	908	0	0	2227	0	654	0	0	1232	3601	594	55	426	0	0	0	0	0	1491	1446	498	153	150	0	1438	0	0	581	251	1152	0	4632	351
P.indica_2	2978	0	0	0	0	177	1043	2921	0	0	1260	0	4327	939	0	0	1906	107	0	3797	0	1184	0	0	2025	8092	1298	34	0	2309	842	0	252	0	1502	2349	733	188	164	0	2535	942	0	965	467	0	0	8543	562
PSB_1	1556	0	0	219	0	133	654	49	0	0	495	0	1285	700	0	0	1032	0	0	1667	0	0	0	2073	0	3480	324	1057	227	0	138	0	0	127	737	0	469	0	25	3997	0	928	141	402	329	0	0	0	212
PSB_2	0	0	0	0	1413	0	966	70	0	0	0	0	1968	0	563	0	1726	0	2229	2498	0	0	0	3307	0	6241	381	892	545	0	223	0	211	0	1170	0	0	168	0	6651	0	1321	206	0	0	0	0	5720	322
[truncated: 134 more columns]
